# Supplementary material for: The induction of pyrenoid synthesis by hyperoxia and its implications for the natural diversity of photosynthetic responses in Chlamydomonas
Source: eLife. 2021 Dec 22;10:e67565. doi: 10.7554/eLife.67565 (PMC8694700; doi:10.7554/eLife.67565)
Supplement: Supplementary file 1. [file elife-67565-supp1.docx]

**SUPPLEMENTARY FILE 1**

**The Induction of a Pyrenoid by Hyperoxia: Implications for the Natural Diversity of Photosynthetic Responses in *Chlamydomonas***

Peter Neofotis1, Joshua Temple1, 5, Oliver L. Tessmer1, Jacob Bibik1, Nicole Norris1, Eric Poliner1, Ben Lucker1, Sarathi M. Weraduwage1,3, Alecia Withrow2, Barbara Sears1, Greg Mogos1, Melinda Frame2, David Hall1, Joseph Weissman4, and David M. Kramer*1

1MSU-DOE Plant Research Laboratory, Michigan State University, East Lansing, MI

2Center for Advanced Microscopy, Michigan State University, East Lansing, MI

3Great Lakes Bioenergy Research Center, Michigan State University, East Lansing, MI

4Corporate Strategic Research, ExxonMobil, Annandale, NJ

5Department of Plant Biology, Michigan State University, East Lansing, MI

*For correspondence: [kramerd8@msu.edu](mailto:kramerd8@msu.edu)

**Supplementary File 1A**: 2NBH Growth Media

| Volume of Stock Solution (ml/l) | Stock Solution | Stock Solution Content (grams) |
| --- | --- | --- |
| 2 | NaNO3 | 100 g/400 ml |
| 1 | CaCl2 | 10 g/ 400 ml |
| 1 | MgSO4 7H2O | 30 g / 400 ml |
| 1 | TAP Phosphate Solution | 28.8 g K2HPO4 + 14.4g KH2PO4 /100ml |
| 1 | NaCl | 10 g/ 400 ml |
| 1 | Hutner Solution |  |

**Supplementary File 1B**: Rubisco activity rates (in picomole C fixed by rubisco s-1 per ug of Chl), showing effects of hyperoxia on activity of rubisco in CC-1009 and CC-2343. Raw extracts of the cells prior to (zero hours) and after exposure to hyperoxia (31 hours, see Materials and Methods) were assayed rapidly (hatched bars), reflecting the native activation state, or after pre-incubation for 10 minutes in the presence of MgCl2, H12CO3-, and 6-phosphogluconate, which promotes reactivation of inhibited enzyme (solid bars) (See Figure 1 for graph). STD is the standard deviation of the three biological replicates, each with three technical replicates.

**Supplementary File 1C**: Rates of oxygen evolution in CC-2343 and CC-1009 (μM O2 min-1) and maximum oxygen compensation point in control and cells pre-treated for 6 hours with hydrogen peroxide (see Figure 14 for graphs).
